# Supplementary material
Source: Springer Nature journal article supplement (https://www.springermedizin.de/resource/supplementary/13685_2013_26_MOESM1_ESM.pdf/9681250)

**A. Mitochondrial (ROS generation and neutralization)**

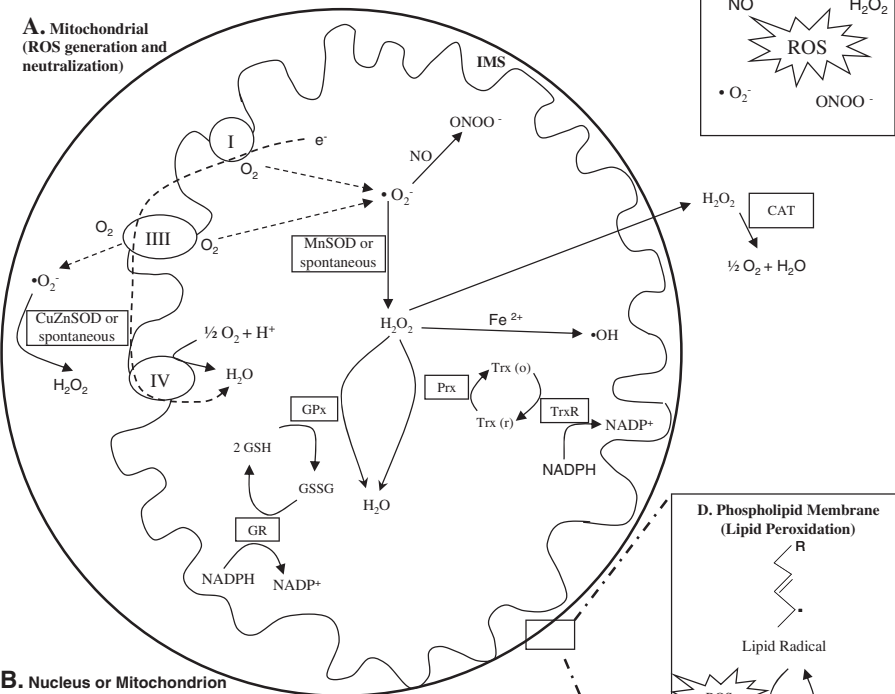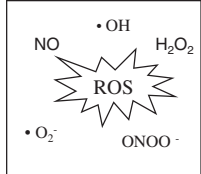

**B. Nucleus or Mitochondrion (Base Excision Repair)**

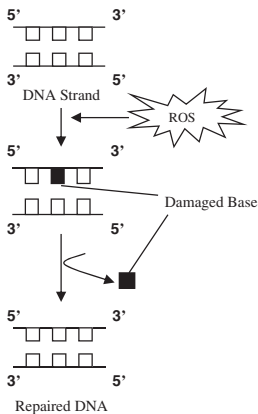

**C. Cytosol (Protein Degradation and Repair)**

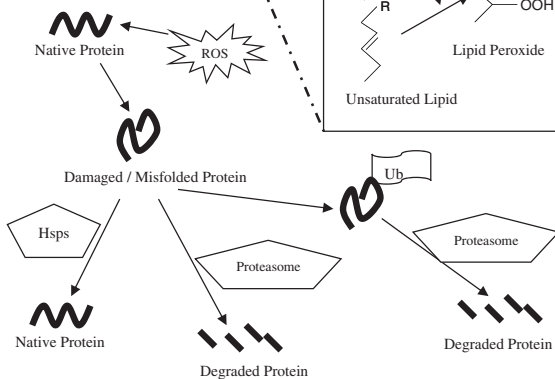

**D. Phospholipid Membrane (Lipid Peroxidation)**

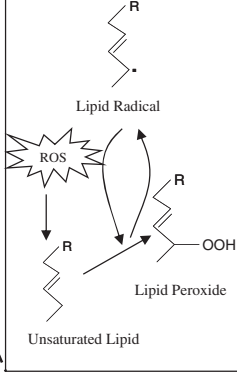

Supplement: MOESM1 [file 9681250]
